# Supplementary material for: Giant meiotic spindles in males from Drosophila species with giant sperm tails
Source: Oxford University Press journal article supplement (doi:10.1242/jcs.101469), 2012-02-01
Supplement: jcs101469tables1.pdf [file jcs101469tables1.pdf]

**Table S1. Average spindle length ( $\mu\text{m} \pm \text{s.e.m.}$ ) and area ( $\mu\text{m}^2 \pm \text{s.e.m.}$ ) in six *Drosophila* species**

| Species                 | Metaphase I     |               | Telophase I    |                | Metaphase II   |               | Telophase II   |               |
|-------------------------|-----------------|---------------|----------------|----------------|----------------|---------------|----------------|---------------|
|                         | Length          | Area          | Length         | Area           | Length         | Area          | Length         | Area          |
| <i>D. bifurca</i>       | 63.4 $\pm$ 2.63 | 3026 $\pm$ 94 | 68.6 $\pm$ 3.6 | 2304 $\pm$ 152 | 38.7 $\pm$ 2.0 | 1209 $\pm$ 55 | 48.2 $\pm$ 2.4 | 1149 $\pm$ 76 |
| <i>D. hydei</i>         | 46,8 $\pm$ 1,7  | 1887 $\pm$ 64 | 51.8 $\pm$ 1.6 | 1200 $\pm$ 51  | 31.5 $\pm$ 0.5 | 739 $\pm$ 18  | 36.5 $\pm$ 0.7 | 551 $\pm$ 21  |
| <i>D. nanoptera</i>     | 41.5 $\pm$ 2.8  | 1451 $\pm$ 37 | 41.9 $\pm$ 1.0 | 785 $\pm$ 55   | 27.8 $\pm$ 0.7 | 626 $\pm$ 22  | 33.2 $\pm$ 2.1 | 460 $\pm$ 22  |
| <i>D. melanogaster</i>  | 23.3 $\pm$ 0.2  | 364 $\pm$ 4   | 27.4 $\pm$ 0.5 | 322 $\pm$ 8    | 16.4 $\pm$ 0.3 | 165 $\pm$ 5   | 20.0 $\pm$ 1.0 | 140 $\pm$ 5   |
| <i>D. pseudoobscura</i> | 13.0 $\pm$ 0.2  | 119 $\pm$ 3   | 15.0 $\pm$ 0.5 | 84 $\pm$ 4     | 9.0 $\pm$ 0.1  | 53 $\pm$ 1    | 11.1 $\pm$ 0.2 | 46 $\pm$ 2    |
| <i>D. persimilis</i>    | 12.8 $\pm$ 0.2  | 103 $\pm$ 2   | 17.0 $\pm$ 0.6 | 91 $\pm$ 1     | 8.7 $\pm$ 0.1  | 34 $\pm$ 1    | 13.1 $\pm$ 0.3 | 43 $\pm$ 2    |
